# Supplementary material for: Tuning the nanostructure and molecular orientation of high molecular weight diketopyrrolopyrrole-based polymers for high-performance field-effect transistors
Source: Royal Society of Chemistry journal article supplement (doi:10.1039/d2nr05382a), 2022-12-06
Supplement: d2nr05382a1.pdf [file d2nr05382a1.pdf]

Electronic Supplementary Information

**Tuning Nanostructures and Molecular Orientation of High Molecular Weight Diketopyrrolopyrrole-Based Polymers for High-Performance Field-Effect Transistors**

Junyang Deng,<sup>a,b</sup> Yifu Guo,<sup>a</sup> Weiwei Li,<sup>c</sup> Zhenhua Xie,<sup>d,e</sup> Yubin Ke,<sup>d,e</sup> René A. J. Janssen,<sup>f</sup> and Mengmeng Li<sup>\*a,b</sup>

\*Email: limengmeng@ime.ac.cn

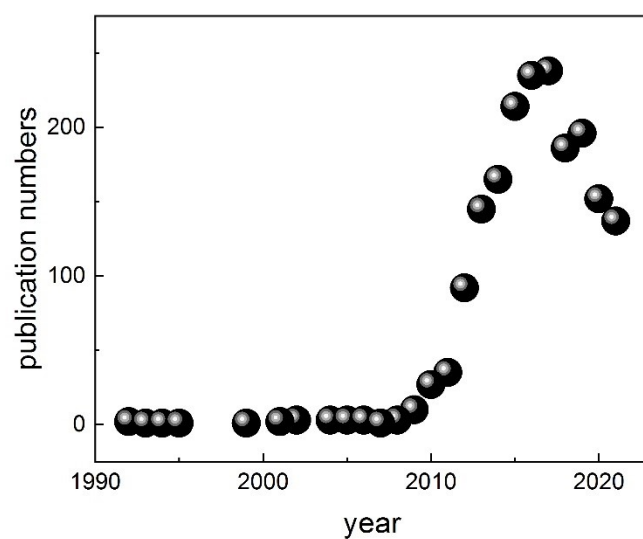

**Figure S1.** Annual number of scientific publications on “diketopyrrolopyrrole polymer” since 1993, searched using Web of Science.

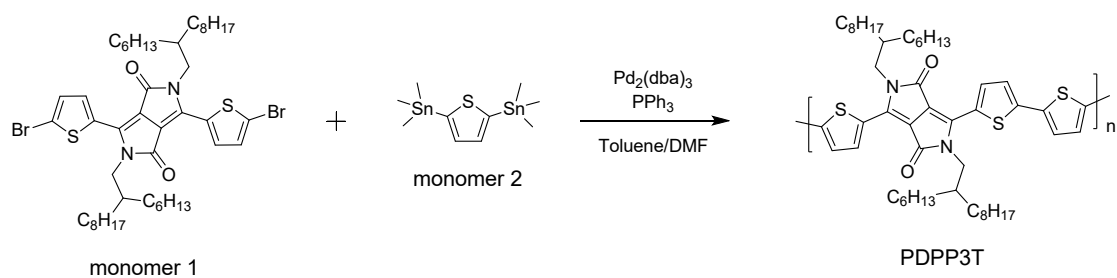

**Figure S2.** Polymerization reaction used for PDPP3T. Details can be found in literature<sup>1</sup>.

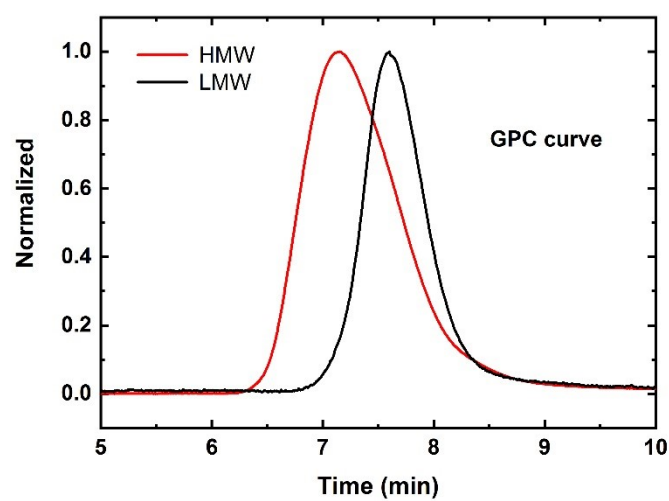

**Figure S3.** GPC traces of two batches of PDPP3T.

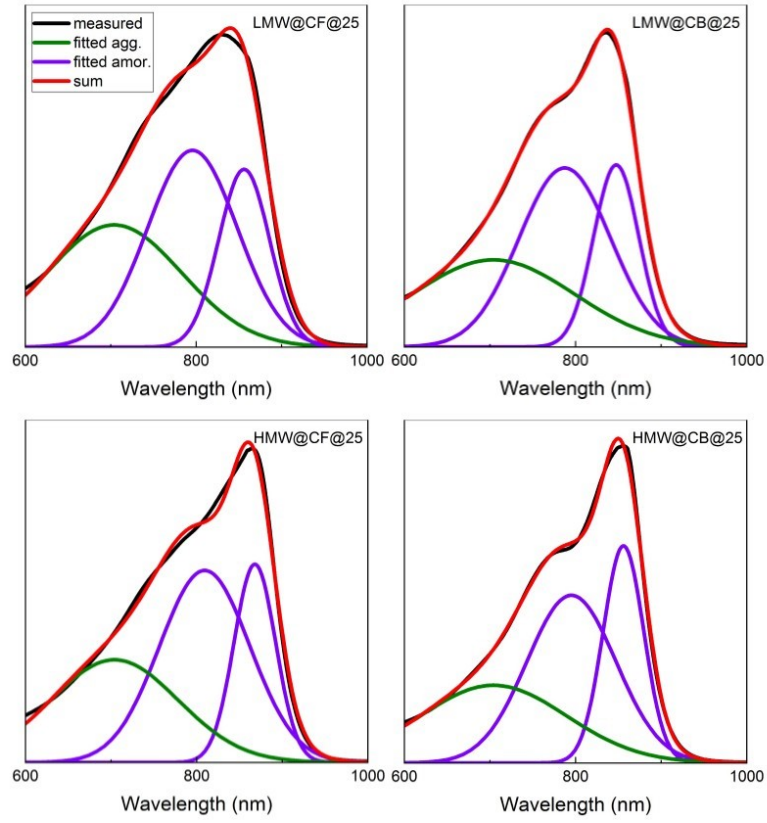

**Figure S4.** Decomposition analysis of representative absorption spectra in Figure 1.

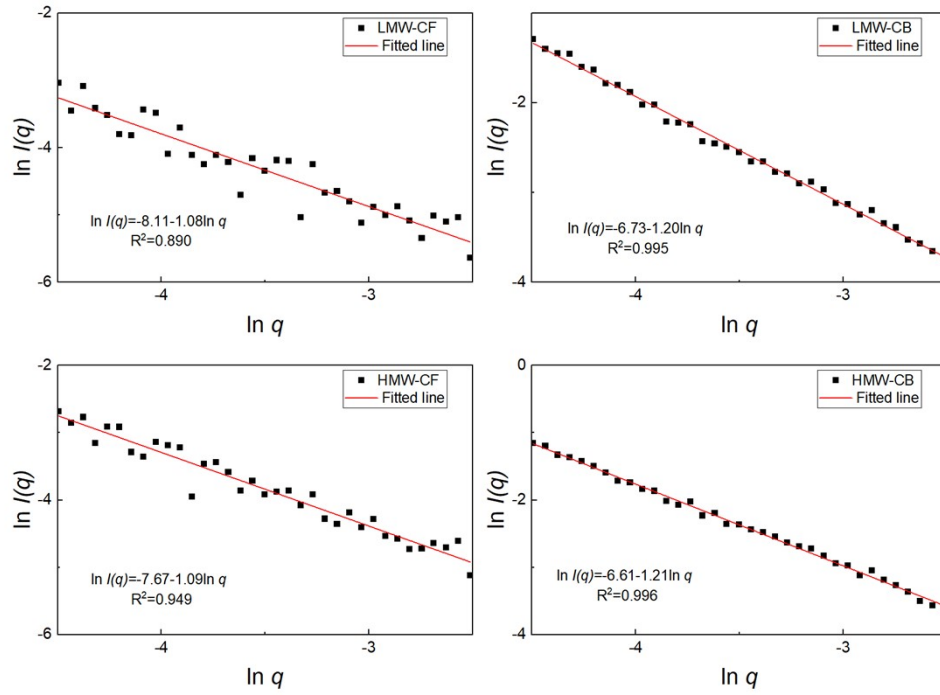

**Figure S5.** SANS profiles and fitted lines for PDPP3T solutions, where deuterated CF-*d* and CB-*d*5 were used to dissolve polymers. The Porod law,  $I(q) \sim q^{-n}$ , where  $I(q)$  is the scattering intensity and the Porod exponent  $n$  is the fractal dimension of scattering objects, was used for fitting.

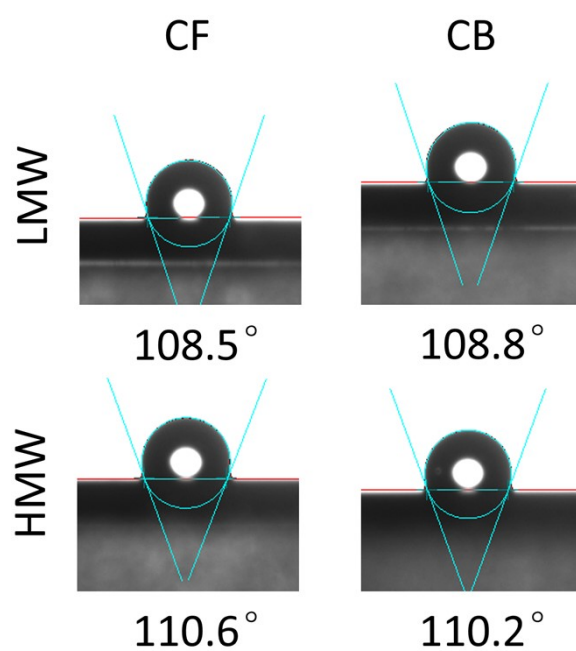

**Figure S6.** Contact angles of PDPP3T films with different molecular weights.

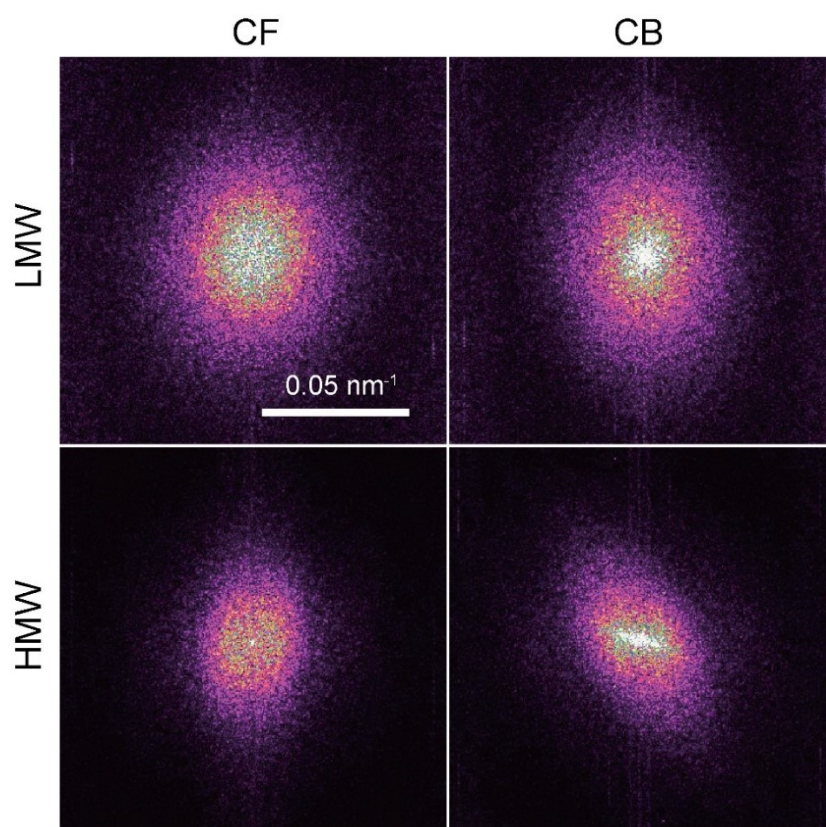

**Figure S7.** Fourier transform images from AFM images in Figure 3. All images share the same scale bar.

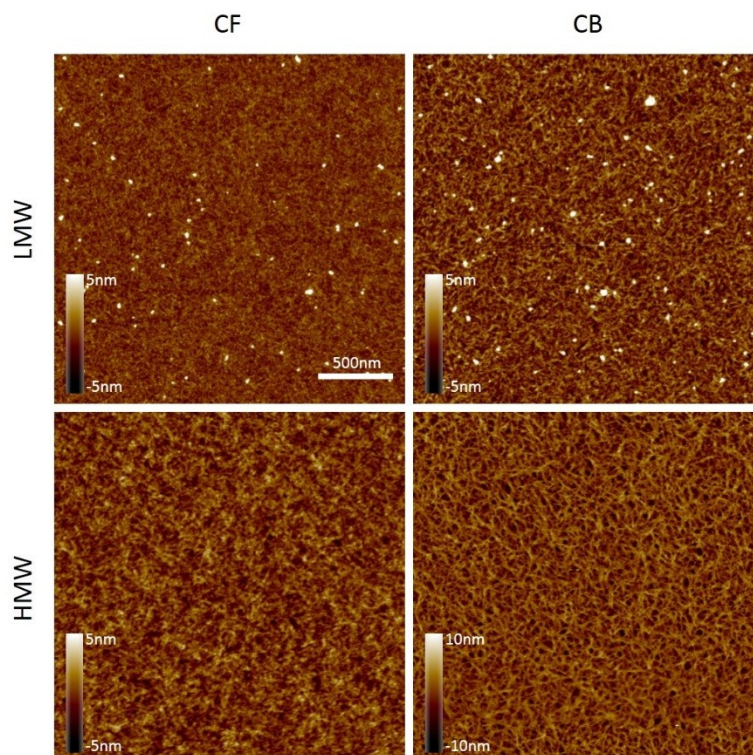

**Figure S8.** AFM height images of LMW and HMW PDPP3T thin films spin-coated from CF and CB. HMW films always show longer nanofibers compared with LMW one, well consistent with Figure 3.

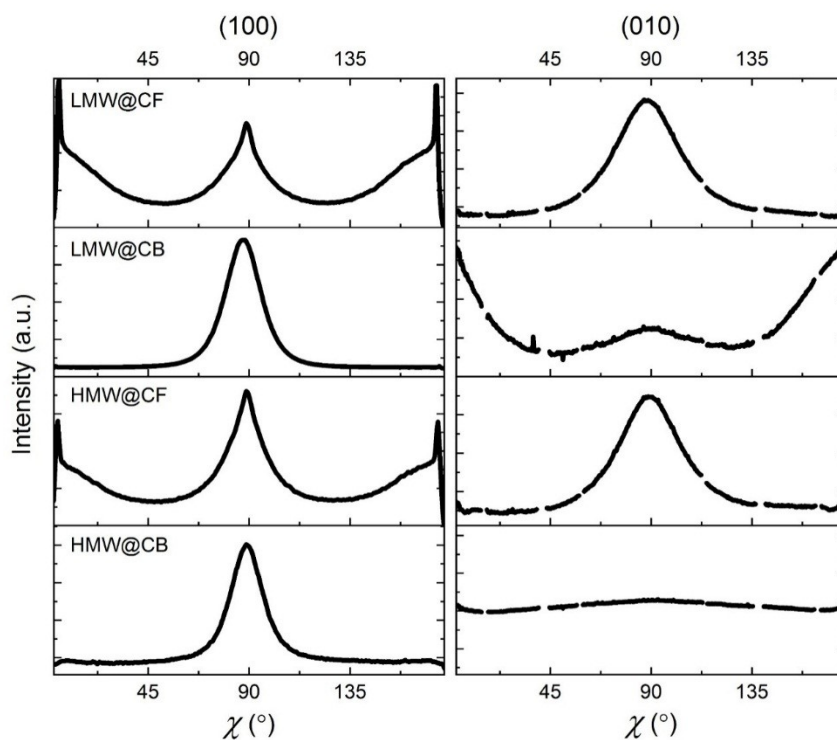

**Figure S9.** Intensity azimuthal pole figure plots for the (100) interlayer and (010)  $\pi$ - $\pi$  stacking reflections.

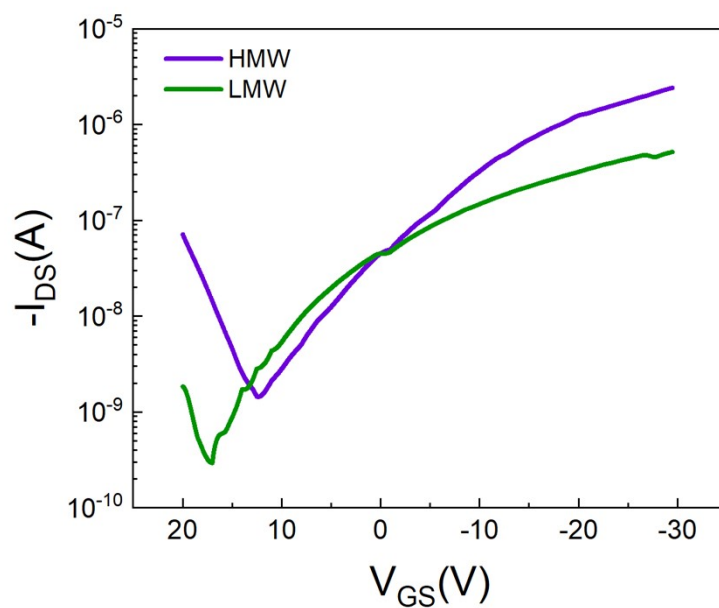

**Figure S10.** Transfer characteristics of PDPP3T polymer transistors from *o*-DCB. HMW polymer transistors show higher mobility ( $0.17 \text{ cm}^2 \text{ V}^{-1} \text{ s}^{-1}$ ) compared to LMW ( $0.025 \text{ cm}^2 \text{ V}^{-1} \text{ s}^{-1}$ ). Toluene as solvent is also tested, and LHM polymer transistors show a mobility of  $0.043 \text{ cm}^2 \text{ V}^{-1} \text{ s}^{-1}$ , while HMW polymer is almost insoluble.

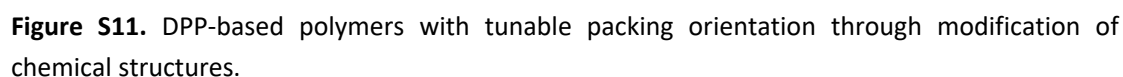

**Figure S11.** DPP-based polymers with tunable packing orientation through modification of chemical structures.

**Table S1.** The molar ratio of two monomers used for polymerization.

| Polymer | Monomer 1<br>(equ) | Monomer 2<br>(equ) | $M_n$<br>(kg mol <sup>-1</sup> ) | $M_w$<br>(kg mol <sup>-1</sup> ) | PDI  | $M_{peak}$<br>(kg mol <sup>-1</sup> ) |
|---------|--------------------|--------------------|----------------------------------|----------------------------------|------|---------------------------------------|
| HMW     | 1                  | 1.05               | 68.2                             | 254.8                            | 3.73 | 238.9                                 |
| LMW     | 1                  | 1.2                | 42.6                             | 78.7                             | 1.85 | 75.4                                  |

**Table S2.** Fitted parameters for solution absorption spectra using nucleation-elongation cooperative model.

| polymer | solvent | $\Delta H_e$ (kJ mol <sup>-1</sup> ) | $T_e$ (°C) | $R^2$ (%) |
|---------|---------|--------------------------------------|------------|-----------|
| LMW     | CF      | -55.2                                | 93         | 99.9      |
|         | CB      | -35.2                                | 125        | 98.8      |
| HMW     | CF      | -47.1                                | 117        | 99.9      |
|         | CB      | -80.6                                | 104        | 98.9      |

**Table S3.** Summary of DPP based polymers with tunable packing orientation.

| strategy              | polymers | Orientation               | Ref.      |
|-----------------------|----------|---------------------------|-----------|
| chemical<br>structure | P1-P3    | Face on/Edge on           | 2         |
|                       | P4-P7    | Face on/Edge on           | 3         |
|                       | P8-P11   | Face on/Edge on/Amorphous | 4         |
|                       | P12-P14  | Face on/Edge on           | 5         |
|                       | P15-P18  | Face on/Edge on           | 6         |
|                       | P19-P23  | Face on/Edge on           | 7         |
|                       | P24-P28  | Face on/Edge on           | 8         |
|                       | P29-P31  | Face on/Edge on           | 9         |
|                       | P32-P34  | Edge on                   | 10        |
|                       | P35-P36  | Edge on/Mixed             | 11        |
|                       | P37-P38  | Face on/Edge on           | 12        |
|                       | P39-P40  | Face on/Edge on           | 13        |
|                       | P41-P44  | Face on/Edge on/Mixed     | 14, 15    |
|                       | P45-P47  | Edge on                   | 16        |
|                       | P48-P50  | Face on/Edge on           | 17        |
|                       | P51-P58  | Face on/Edge on           | 18-21     |
|                       | P59-P62  | Mixed                     | 22        |
|                       | P62-P64  | Face on/Edge on           | 23        |
|                       | P65-P68  | Face on/Edge on/Mixed     | 24        |
| solvent quality       | PDPP3T   | Face on/Edge on           | This work |



**Table S4.** Solubility of PDPP3T in CF and CB.

|     |  | Solvent | Solubility (mg mL <sup>-1</sup> ) |
|-----|--|---------|-----------------------------------|
| LMW |  | CF      | >30                               |
|     |  | CB      | >30                               |
| HMW |  | CF      | 5-8                               |
|     |  | CB      | 8-10                              |

## References

1. J. C. Bijleveld, A. P. Zoombelt, S. G. J. Mathijssen, M. M. Wienk, M. Turbiez, D. M. de Leeuw and R. A. J. Janssen, *Journal of the American Chemical Society*, 2009, **131**, 16616-16617.
2. F. Wang, K. Nakano, H. Segawa and K. Tajima, *Chemistry of Materials*, 2019, **31**, 2097-2105.
3. M. S. Chen, O. P. Lee, J. R. Niskala, A. T. Yiu, C. J. Tassone, K. Schmidt, P. M. Beaujuge, S. S. Onishi, M. F. Toney, A. Zettl and J. M. Frechet, *J Am Chem Soc*, 2013, **135**, 19229-19236.
4. M. Gruber, S. H. Jung, S. Schott, D. Venkateshvaran, A. J. Kronemeijer, J. W. Andreasen, C. R. McNeill, W. W. H. Wong, M. Shahid, M. Heeney, J. K. Lee and H. Sirringhaus, *Chem Sci*, 2015, **6**, 6949-6960.
5. C. H. Lee, Y. Y. Lai, J. Y. Hsu, P. K. Huang and Y. J. Cheng, *Chem Sci*, 2017, **8**, 2942-2951.
6. M. Akita, I. Osaka and K. Takimiya, *Materials (Basel)*, 2013, **6**, 1061-1071.
7. B. C. Schroeder, T. Kurosawa, T. Fu, Y. C. Chiu, J. Mun, G. J. N. Wang, X. Gu, L. Shaw, J. W. E. Kneller, T. Kreouzis, M. F. Toney and Z. Bao, *Advanced Functional Materials*, 2017, **27**.
8. J. Shin, G. E. Park, D. H. Lee, H. A. Um, T. W. Lee, M. J. Cho and D. H. Choi, *ACS Appl Mater Interfaces*, 2015, **7**, 3280-3288.
9. G. Y. Lee, A. R. Han, T. Kim, H. R. Lee, J. H. Oh and T. Park, *ACS Appl Mater Interfaces*, 2016, **8**, 12307-12315.
10. I. Meager, R. S. Ashraf, S. Mollinger, B. C. Schroeder, H. Bronstein, D. Beatrup, M. S. Vezie, T. Kirchartz, A. Salleo, J. Nelson and I. McCulloch, *J Am Chem Soc*, 2013, **135**, 11537-11540.
11. S.-H. Kang, H. R. Lee, G. K. Dutta, J. Lee, J. H. Oh and C. Yang, *Macromolecules*, 2017, **50**, 884-890.
12. S. Y. Son, G. Y. Lee, S. Kim, W. T. Park, S. A. Park, Y. Y. Noh and T. Park, *ACS Appl Mater Interfaces*, 2019, **11**, 10751-10757.
13. X. Guo, S. R. Puniredd, M. Baumgarten, W. Pisula and K. Mullen, *Adv Mater*, 2013, **25**, 5467-5472.
14. J. Lee, A. R. Han, J. Kim, Y. Kim, J. H. Oh and C. Yang, *J Am Chem Soc*, 2012, **134**, 20713-20721.
15. J. Lee, A. R. Han, H. Yu, T. J. Shin, C. Yang and J. H. Oh, *J Am Chem Soc*, 2013, **135**, 9540-9547.
16. J. Yao, C. Yu, Z. Liu, H. Luo, Y. Yang, G. Zhang and D. Zhang, *J. Am. Chem. Soc.*, 2016, **138**, 173-185.
17. Z. Wang, Z. Liu, L. Ning, M. Xiao, Y. Yi, Z. Cai, A. Sadhanala, G. Zhang, W. Chen, H. Sirringhaus and D. Zhang, *Chem. Mater.*, 2018, **30**, 3090-3100.
18. X. Zhang, L. J. Richter, D. M. DeLongchamp, R. J. Kline, M. R. Hammond, I. McCulloch, M. Heeney, R. S. Ashraf, J. N. Smith, T. D. Anthopoulos, B. Schroeder, Y. H. Geerts, D. A. Fischer and M. F. Toney, *J Am Chem Soc*, 2011, **133**, 15073-15084.
19. J. S. Lee, S. K. Son, S. Song, H. Kim, D. R. Lee, K. Kim, M. J. Ko, D. H. Choi, B. Kim and J. H. Cho, *Chem. Mater.*, 2012, **24**, 1316-1323.
20. Z. Yi, X. Sun, Y. Zhao, Y. Guo, X. Chen, J. Qin, G. Yu and Y. Liu, *Chem. Mater.*, 2012, **24**, 4350-4356.
21. H. Chen, Y. Guo, G. Yu, Y. Zhao, J. Zhang, D. Gao, H. Liu and Y. Liu, *Adv Mater*, 2012, **24**, 4618-4622.
22. J. Yang, H. Wang, J. Chen, J. Huang, Y. Jiang, J. Zhang, L. Shi, Y. Sun, Z. Wei, G. Yu, Y. Guo, S. Wang and Y. Liu, *Adv Mater*, 2017, **29**.
23. J. D. Yuen, J. Fan, J. Seifter, B. Lim, R. Hufschmid, A. J. Heeger and F. Wudl, *J Am Chem Soc*, 2011, **133**, 20799-20807.
24. T. Hasegawa, M. Ashizawa, J. Hiyoshi, S. Kawauchi, J. Mei, Z. Bao and H. Matsumoto, *Polymer Chemistry*, 2016, **7**, 1181-1190.
